# Supplementary figures and images for: Plasticity in Plastid Redox Networks: Evolution of Glutathione-Dependent Redox Cascades and Glutathionylation Sites
Source: Research Square preprint supplement (doi:10.21203/rs.3.rs-113692/v1), 2020-12-01

**a**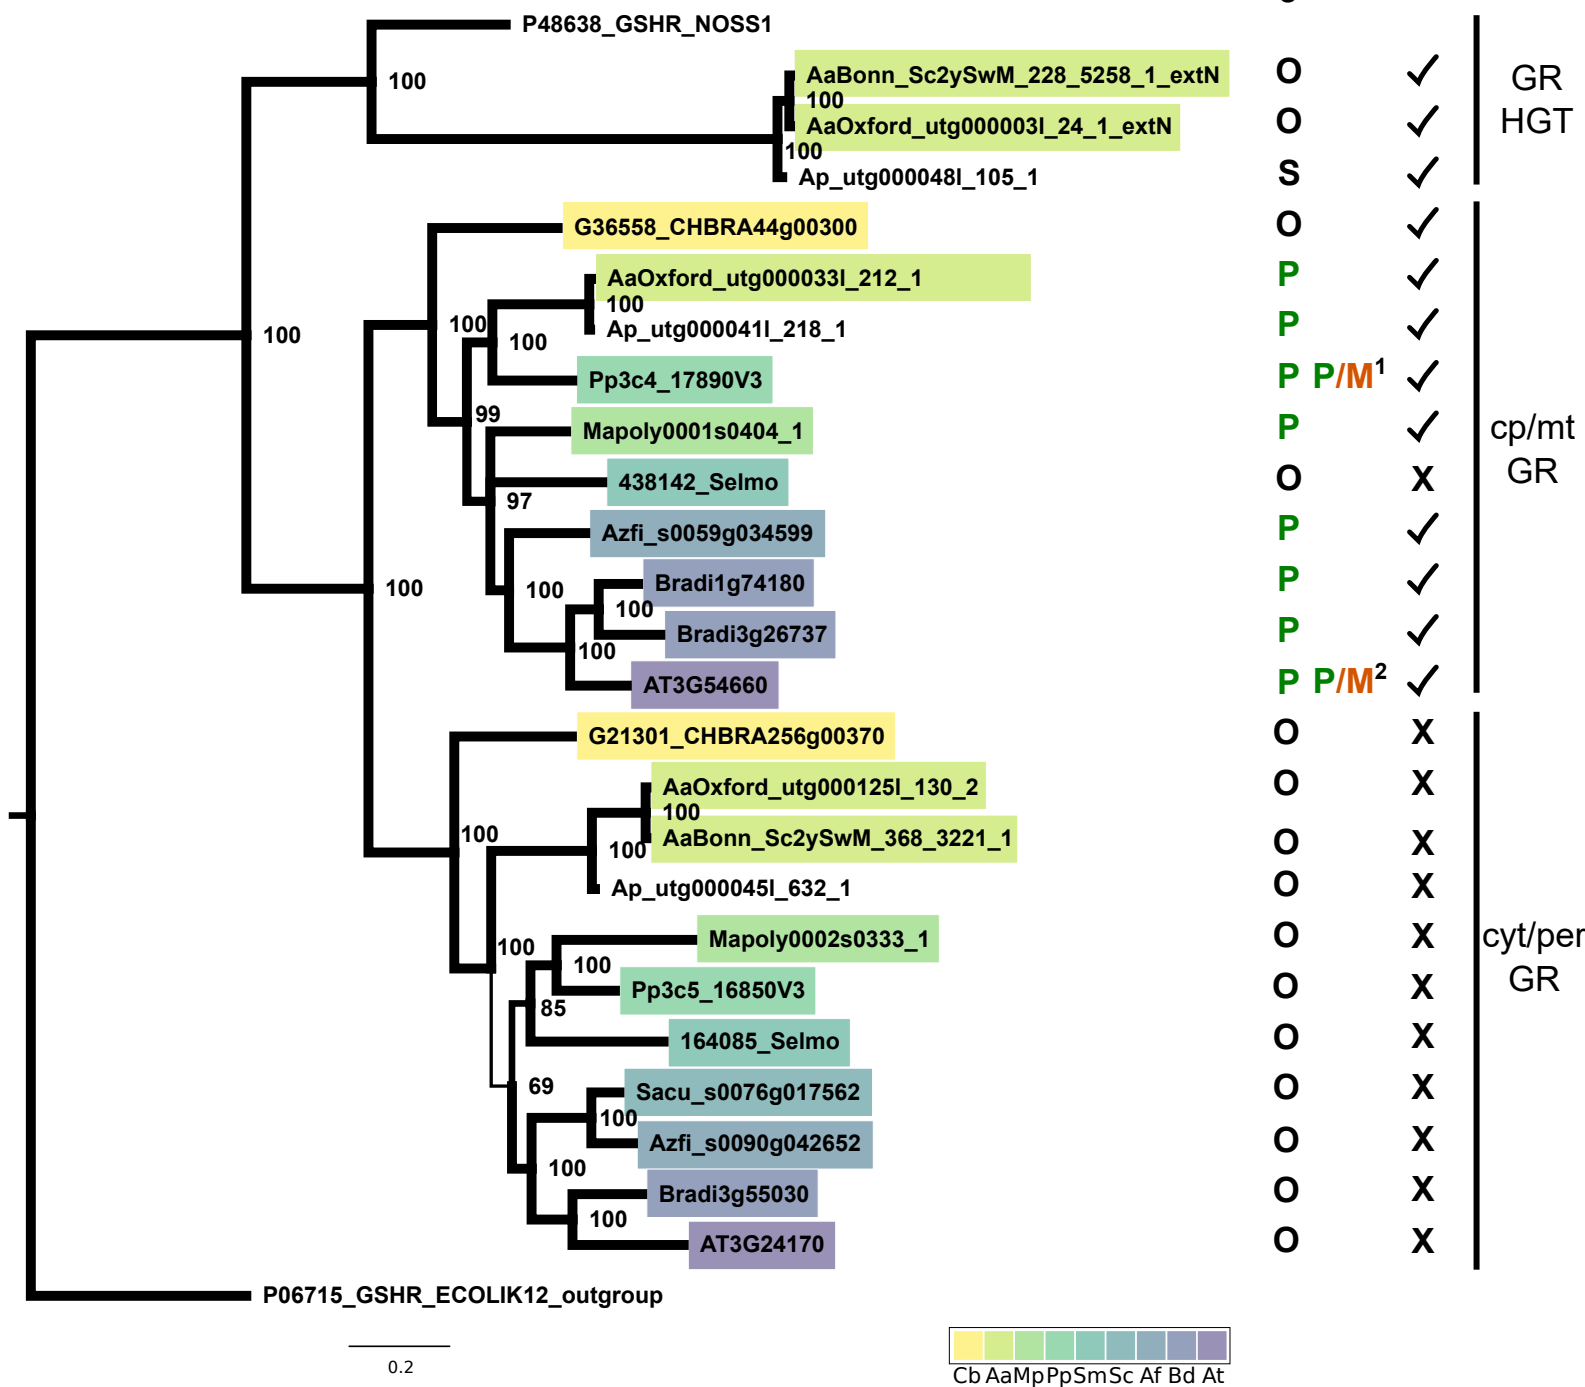**b**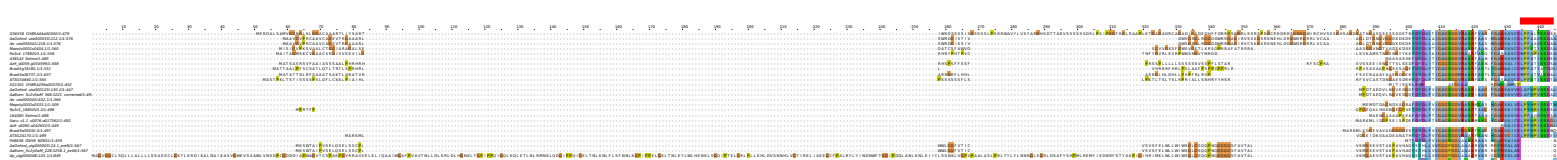

Supplement: Supplementary file 1 [file 80b8090ea8d26ad2eca9f093.pdf]
